# Supplementary material for: The effects of ART on the dynamics of lipid profiles in Chinese Han HIV-infected patients: comparison between NRTI/NNRTI and NRTI/INSTI
Source: PubMed Central journal article supplement (PMC10174832; doi:10.3389/fpubh.2023.1161503), 2023-04-27
Supplement: Image_1.pdf [file Image_1.pdf]

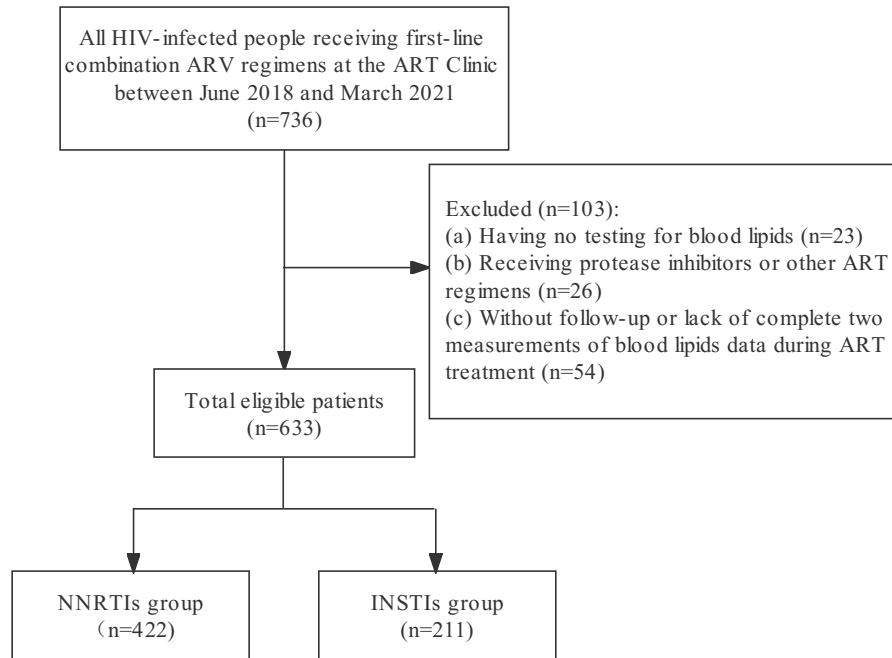

Appendix Figure 1. Selection of the study population according to inclusion and exclusion criteria.
