# Supplementary material for: The effects of ART on the dynamics of lipid profiles in Chinese Han HIV-infected patients: comparison between NRTI/NNRTI and NRTI/INSTI
Source: PubMed Central journal article supplement (PMC10174832; doi:10.3389/fpubh.2023.1161503), 2023-04-27
Supplement: Presentation_1.pdf [file Presentation_1.pdf]

All HIV-infected people receiving first-line combination ARV regimens at the ART Clinic between June 2018 and March 2021 (n=736)

Excluded (n=103):  
(a) Having no testing for blood lipids (n=23)  
(b) Receiving protease inhibitors or other ART regimens (n=26)  
(c) Without follow-up or lack of complete two measurements of blood lipids data during ART treatment (n=54)

Total eligible patients (n=633)

NNRTIs group (n=422)

INSTIs group (n=211)
